# Supplementary material
Source: Research Square preprint supplement (doi:10.21203/rs.3.rs-8846270/v1)
Supplement: Supplementary file 1 [file 52a210bc201db658ffccc541.docx]

**Supplementary Information**

**Physics-informed unsupervised machine learning for 4D-STEM materials characterization**

Koji Kimoto, Ovidiu Cretu, Koji Harano, Fumihiko Uesugi, Jun Kikkawa, Kenji Nagata, Yuki Shibazaki, Takashi Matsumoto, and Yoshiki Sakuma

# S1. NMF codes for DigitalMicrograph

There are two major NMF algorithms: alternating least squares (ALS) and multiplicative update (MU). Both algorithms determine the matrices ***W*** and ***H*** by minimizing the cost function, , through iterative updates. The update rules for the ALS-based NMF algorithm are as follows:

, (S1)

, (S2)

where denotes the nonnegativity constraint, i.e., . The corresponding DigitalMicrograph script is as follows:

**List S1 | DigitalMicrograph code snippet for primitive NMF**

**based on the ALS algorithm.**

| /* DigitalMicrograph script for alternating least squares (ALS) NMF */  // KIMOTO and UESUGI of NIMS  H = UniformRandom()  HT = MatrixTranspose(H)  HHT = MatrixMultiply(H, HT)  IHHT= MatrixInverse(HHT)  XHT = MatrixMultiply(X, HT)  W = MatrixMultiply(XHT, IHHT)  W = tert(W<0, 0, W) // Nonnegativity constraint []+  // It is replaced by []W for constrained NMF  WT = MatrixTranspose(W)  WTW = MatrixMultiply(WT, W)  IWTW= MatrixInverse(WTW)  WTX = MatrixMultiply(WT, X)  H = MatrixMultiply(IWTW, WTX)  H = tert(H<0, 0, H) // Nonnegativity constraint  // It is replaced by []H for constrained NMF  MSE = MeanSquare(X - MatrixMultiply(W, H)) |
| --- |

The basic equations and DigitalMicrograph script for the MU algorithm are as follows:

, (S3)

, (S4)

where and denote elementwise multiplication and division, respectively.

**List S2 | DigitalMicrograph code snippet for primitive NMF**

**based MU algorithm.**

| /* DigitalMicrograph script for multiplicative update (MU) NMF */  // Koji KIMOTO of NIMS  H = UniformRandom()  W = UniformRandom()  HT = MatrixTranspose(H)  XHT = MatrixMultiply(X, HT)  WH = MatrixMultiply(W, H)  WHHT= MatrixMultiply(WH, HT)  W = W * XHT / WHHT // Elementwise calculation  WT = MatrixTranspose(W)  WTX = MatrixMultiply(WT, X)  WTW = MatrixMultiply(WT, W)  WTWH= MatrixMultiply(WTW, H)  H = H * WTX / WTWH // Elementwise calculation  MSE = MeanSquare(X - MatrixMultiply(W,H)) |
| --- |

# S2. Detailed procedure for the constraint on diffraction

The constraint on diffraction is outlined in **Fig. 2a**. Here, we present a DigitalMicrograph script designed to remove unnatural intensity drops based on rotational averaging. This script operates on a frontmost 2D diffraction and should therefore be applied to the refolded diffractions corresponding to all columns of the matrix ***W*** during each NMF iteration.

**List S3 | DigitalMicrograph script for constraint on diffraction.**

| /* DigitalMicrograph script for downward-convex peak correction */  // Koji KIMOTO of NIMS  // ver. 2  image ColumnOutlierEraser(image imgIn)  {  number thresholdfactor = 2 // threshold = mean *2  image imgOut :=imageclone(imgIn)  number sizeX, sizeY  GetSize(imgIn, sizeX, sizeY)  image columnI  for(number i=0; i<sizeX ;i++)  {  columnI = imgIn[0,i,sizeY,i+1]  number mean = mean(columnI)  columnI = tert(columnI<(mean*thresholdfactor),columnI,mean)  imgOut[0,i,sizeY,i+1] = columnI[0,0,sizeY,1]  }  return imgOut  }  image RotationalAvergewoO(image img)  {  number samplingfactor = 8 // Rotation phi-sampling factor  number sizeX,sizeY  GetSize(img, sizeX, sizeY)  number size = min(sizex, sizeY)  number sampling = (size/2)*samplingfactor  image imgRPhi := CreateFloatImage("r-phi transformed", size/2, sampling)  number k = 2*pi()/sampling  imgRPhi = warp(img,icol*sin(irow*k)+sizeX/2,icol*cos(irow*k)+sizeY/2)  imgRPhi = ColumnOutlierEraser(imgRPhi)  image img1DProj := CreateFloatImage("1D projection", size/2, 1 )  img1DProj[icol,0] += imgRPhi  img1DProj /= sampling  image imgOut = imageclone(img)  imgOut = warp( img1DProj, iradius, 0 )  return imgOut  }  // Main  image img:=GetFrontImage()  image imgRAwoO = imageclone(img)  SetName(imgRAwoO, "Rotational average without outliers")  imgRAwoO = RotationalAvergewoO(img)  ShowImage(imgRAwoO)  image imgDarkPeak = imageclone(img)  setname(imgDarkPeak, "Downward-convex peaks")  imgDarkPeak = - img + imgRAwoO  imgDarkPeak = tert(imgDarkPeak>0, imgDarkPeak, 0)  ShowImage(imgDarkPeak)  image imgNDCP = imageclone(img)  SetName(imgNDCP, "No downward-convex peak")  imgNDCP = img + imgDarkPeak  ShowImage(imgNDCP) |
| --- |

# S3. NMF for 4D-STEM using scikit-learn on DigitalMicrograph

Various Python libraries, such as Scikit-learn, can be used within DigitalMicrograph via Miniconda, and 4D-STEM data in DigitalMicrograph format (*.dm4) can be processed as NumPy arrays. The following presents the Python code for primitive NMF executed within DigitalMicrograph. Note that the coordinate order of 4D-STEM data in DigitalMicrograph is (*x, y, u, v*), which differs from the convention typically used in Python. It should also be noted that DigitalMicrograph supports both legacy and updated coordinate conventions, namely (*x,y,u,v*) and (*u,v,x,y*), respectively.

**List S4 | Python script for NMF for DigitalMicrograph 4D-STEM data**

**using scikit-learn.**

| # Scikit-learn NMF for 4D-STEM through Python on DigitalMicrograph  # Koji KIMOTO of NIMS  import DigitalMicrograph as DM  import numpy as np  import sys  import joblib  import scipy  import sklearn  # Get data array of frontmost image  SIdata = DM.GetFrontImage().GetNumArray()  nChannelsV = SIdata.shape[0]  nChannelsU = SIdata.shape[1]  nChannelsY = SIdata.shape[2]  nChannelsX = SIdata.shape[3]  nChannels = nChannelsV * nChannelsU  nPoints = nChannelsY * nChannelsX  # Unfolding  data = SIdata.reshape( nChannels, nPoints ).transpose()  # Parameters  from sklearn.decomposition import NMF  num_comp = 4 # Assumed number of components  str_init = 'random' # Initialization  str_solver = 'cd' # Coordinate Descent(cd),Multiplicative Update (mu)  num_tol = 1e-4 # Tolerance of stopping  num_maxi = 3000 # Maximum iterations  alpha_W0 = 0.1 # Regularization for W  alpha_H0 = 0.1 # Regularization for H  print("\nNMF ")  print("Components\t Initialization\t Solver\t Tolerance\t MaxInteration\t Alpha_W\t Alpha_H")  print(num_comp, "\t\t", str_init,"\t\t", str_solver,"\t\t", num_tol,"\t\t", num_maxi,"\t\t", alpha_W0,"\t\t", alpha_H0)  # NMF  estimator = NMF(n_components=num_comp, init=str_init, solver=str_solver, tol=num_tol, max_iter=num_maxi, alpha_W=alpha_W0, alpha_H=alpha_H0)  # H refolding  arr_H = estimator.fit_transform(data)  asStackH = ( SIdata.shape[2] , SIdata.shape[3], num_comp )  resultStackH = DM.CreateImage(arr_H.reshape(asStackH ).transpose(2,0,1). copy())  resultStackH.SetName("Map")  resultStackH.ShowImage()  # W refolding  arr_W = estimator.components_  asStackW = ( num_comp, nChannelsU, nChannelsV )  resultStackW = DM.CreateImage( arr_W.reshape( asStackW ).copy() )  resultStackW.SetName("Diff.")  resultStackW.ShowImage()  # Mean squared error (MSE)  HW = np.matmul(arr_H,arr_W)  XHW = data - HW  XHW2 = XHW**2  mse = XHW2.sum()  mse = mse/(nChannels * nPoints)  print("Mean squared error: ", mse)  del resultStackH  del resultStackW |
| --- |
